# Supplementary material for: DFT investigation on the selective complexation of ionic liquids based on α-amino acid anion and N7,N9-dimethyladeninium cation with CO2
Source: Royal Society of Chemistry journal article supplement (doi:10.1039/c6ra15362c), 2016-01-01
Supplement: c6ra15362c1.pdf [file c6ra15362c1.pdf]

CO2-2[dMA][Ala]

0 1

|   |             |             |             |
|---|-------------|-------------|-------------|
| N | -4.20342400 | -3.72343000 | -0.14275700 |
| C | -5.48616000 | -4.08669800 | -0.05384200 |
| N | -6.55823600 | -3.30111400 | 0.07151000  |
| C | -6.22631800 | -2.01519100 | 0.10173200  |
| C | -4.93531200 | -1.49455600 | 0.01485100  |
| C | -3.88035400 | -2.42967400 | -0.11524000 |
| N | -7.08513300 | -0.93192200 | 0.21817100  |
| C | -6.35961900 | 0.19857500  | 0.20311900  |
| N | -5.06158700 | -0.10175600 | 0.08158700  |
| N | -2.57614500 | -2.01826300 | -0.19847000 |
| C | -8.54397700 | -0.98585000 | 0.33845500  |
| C | -4.00538900 | 0.92183900  | 0.02883900  |
| H | -5.67401700 | -5.15503000 | -0.08508800 |
| H | -6.82281700 | 1.23513200  | 0.27803100  |
| H | -2.39237900 | -1.03277200 | -0.09182800 |
| H | -8.81591100 | -1.53861500 | 1.23757900  |
| H | -8.96282800 | -1.48943000 | -0.53253100 |
| H | -8.91118800 | 0.03750300  | 0.39771800  |
| H | -3.46058600 | 0.83661300  | -0.91300500 |
| H | -3.32790100 | 0.79384700  | 0.87561200  |
| H | -4.49392000 | 1.90427700  | 0.08915800  |
| N | -6.67949400 | 6.06718100  | 0.73699300  |
| C | -7.56980400 | 4.98736300  | 0.29084200  |
| C | -6.92032400 | 3.58193000  | 0.29805600  |
| O | -5.67227800 | 3.50508100  | 0.19564200  |
| O | -7.71502200 | 2.59193800  | 0.37720300  |
| H | -5.77591400 | 5.91960200  | 0.29068900  |
| H | -6.49884900 | 5.95944700  | 1.73139000  |
| H | -8.42793000 | 4.95015200  | 0.96810100  |

|   |             |             |             |
|---|-------------|-------------|-------------|
| C | -1.39176900 | -2.77175700 | -0.44825200 |
| O | -1.37232100 | -3.95594900 | -0.68247100 |
| O | -0.36771300 | -1.94862600 | -0.38906000 |
| H | 0.56518000  | -2.48947200 | -0.60002000 |
| N | 9.23434800  | 3.36128400  | -0.48384100 |
| C | 9.44203200  | 3.14063800  | 0.81811700  |
| N | 8.84116600  | 2.24345700  | 1.60215900  |
| C | 7.94557100  | 1.52310900  | 0.93602000  |
| C | 7.62751900  | 1.64289900  | -0.41665400 |
| C | 8.32764900  | 2.62731500  | -1.14559400 |
| N | 7.14807200  | 0.50661800  | 1.44083800  |
| C | 6.38205300  | 0.02701500  | 0.44695700  |
| N | 6.64303300  | 0.68717400  | -0.68566100 |
| N | 8.16754700  | 2.87318300  | -2.46783700 |
| C | 7.12897900  | 0.02254900  | 2.82468100  |
| C | 5.97078700  | 0.40852900  | -1.96363200 |
| H | 10.18929400 | 3.77041600  | 1.28917600  |
| H | 5.63923800  | -0.80623600 | 0.58567700  |
| H | 8.67800800  | 3.64968200  | -2.85900400 |
| H | 7.43256500  | 2.45418400  | -3.00966100 |
| H | 6.87626100  | 0.84521700  | 3.49284200  |
| H | 8.11241000  | -0.36598800 | 3.08797800  |
| H | 6.37990400  | -0.76440100 | 2.89352600  |
| H | 6.71205800  | 0.10981700  | -2.70695900 |
| H | 5.43256000  | 1.29945800  | -2.29325800 |
| H | 5.25779100  | -0.40798100 | -1.79556600 |
| N | 1.76860500  | -3.25115400 | -0.85566700 |
| C | 2.71402200  | -3.30413700 | 0.28500500  |
| C | 3.85649600  | -2.28856600 | 0.04508200  |
| O | 4.00169500  | -1.84032600 | -1.11885600 |
| O | 4.56704300  | -2.00920500 | 1.05018600  |

|   |             |             |             |
|---|-------------|-------------|-------------|
| H | 1.42124400  | -4.17544200 | -1.09981100 |
| H | 2.29146500  | -2.86838600 | -1.64734400 |
| H | 2.18769600  | -2.98842800 | 1.19015000  |
| C | 3.28843900  | -4.70734300 | 0.51186000  |
| H | 3.96824900  | -4.69814700 | 1.36529300  |
| H | 2.48813000  | -5.42525800 | 0.71562600  |
| H | 3.84248600  | -5.04703600 | -0.36887600 |
| C | -8.08202800 | 5.29316200  | -1.12368600 |
| H | -8.76759700 | 4.51402300  | -1.46472800 |
| H | -8.59608500 | 6.25714600  | -1.13483100 |
| H | -7.24408400 | 5.34709200  | -1.82667300 |

CO2-2[dMA][Gly]

0 1

|   |            |             |             |
|---|------------|-------------|-------------|
| N | 4.55039000 | -3.44097800 | 0.27502300  |
| C | 5.82004000 | -3.84705600 | 0.36708900  |
| N | 6.92735400 | -3.10236700 | 0.32970800  |
| C | 6.64949000 | -1.81168800 | 0.18366700  |
| C | 5.37732600 | -1.24860600 | 0.08059800  |
| C | 4.28143700 | -2.14238200 | 0.13417600  |
| N | 7.55520600 | -0.76337600 | 0.11393700  |
| C | 6.87556000 | 0.38714900  | -0.02440600 |
| N | 5.56212600 | 0.13319200  | -0.04795100 |
| N | 2.99120400 | -1.69051700 | 0.03153600  |
| C | 9.01475200 | -0.86714700 | 0.18229800  |
| C | 4.54563900 | 1.18898600  | -0.18363100 |
| H | 5.96327600 | -4.91646600 | 0.48280100  |
| H | 7.38383500 | 1.40441500  | -0.09920600 |
| H | 2.85508600 | -0.71445200 | -0.18122300 |
| H | 9.37607600 | -1.48230600 | -0.64164400 |
| H | 9.30290500 | -1.32773300 | 1.12704300  |
| H | 9.42381000 | 0.13946700  | 0.11120300  |

|   |              |             |             |
|---|--------------|-------------|-------------|
| H | 3.88347400   | 1.17235200  | 0.68369000  |
| H | 3.97637700   | 1.03432300  | -1.10258700 |
| H | 5.07294600   | 2.15178900  | -0.23157800 |
| N | 7.45878800   | 6.27773800  | -0.54124500 |
| C | 8.28236500   | 5.10325000  | -0.25492200 |
| C | 7.56780800   | 3.73751800  | -0.23863700 |
| O | 6.31534500   | 3.71365200  | -0.27064200 |
| O | 8.32562500   | 2.71796400  | -0.16556800 |
| H | 6.59666800   | 6.19440500  | -0.00827800 |
| H | 7.16268900   | 6.24506400  | -1.51260800 |
| H | 9.10670600   | 5.04941200  | -0.97083200 |
| H | 8.75093700   | 5.22413900  | 0.72883600  |
| C | 1.76426400   | -2.38692800 | 0.22565900  |
| O | 1.67880800   | -3.53595800 | 0.58511700  |
| O | 0.77836400   | -1.55395200 | -0.03577300 |
| H | -0.17730800  | -2.04443100 | 0.14293900  |
| N | -10.03378500 | 2.43222300  | 0.78759400  |
| C | -10.38085800 | 2.07874200  | -0.45400500 |
| N | -9.70760700  | 1.29785700  | -1.30107200 |
| C | -8.57077200  | 0.85717700  | -0.77323900 |
| C | -8.08702000  | 1.14056500  | 0.50373300  |
| C | -8.88400600  | 1.98058900  | 1.30971900  |
| N | -7.63597300  | 0.02703700  | -1.37444600 |
| C | -6.63169900  | -0.18835000 | -0.50838500 |
| N | -6.86948500  | 0.46573600  | 0.63295400  |
| N | -8.58457900  | 2.34953800  | 2.57811800  |
| C | -7.71282200  | -0.53078800 | -2.72818300 |
| C | -5.96382500  | 0.43903900  | 1.79126000  |
| H | -11.32347200 | 2.47943000  | -0.81161100 |
| H | -5.73747200  | -0.83053500 | -0.74248800 |
| H | -9.20162900  | 3.00965700  | 3.02537200  |

|   |             |             |             |
|---|-------------|-------------|-------------|
| H | -7.69271800 | 2.15797200  | 2.99901900  |
| H | -7.74838400 | 0.28098700  | -3.45418500 |
| H | -8.61406100 | -1.13610900 | -2.82069600 |
| H | -6.82702200 | -1.14282000 | -2.88903500 |
| H | -6.50061900 | 0.05917700  | 2.66221900  |
| H | -5.58470300 | 1.44518100  | 1.98151600  |
| H | -5.12999000 | -0.23134200 | 1.54934500  |
| N | -1.43474500 | -2.75747200 | 0.38628800  |
| C | -2.40432200 | -2.76452600 | -0.72954200 |
| C | -3.66396800 | -1.94824500 | -0.38278200 |
| O | -3.76370700 | -1.50738600 | 0.78814400  |
| O | -4.49762000 | -1.79825600 | -1.31773400 |
| H | -1.12703300 | -3.69470800 | 0.62968600  |
| H | -1.93388800 | -2.36288800 | 1.18859500  |
| H | -1.95558400 | -2.33718500 | -1.62962600 |
| H | -2.72400200 | -3.77936700 | -0.98094100 |

CO2-2[dMA][Val

0 1

|   |             |             |             |
|---|-------------|-------------|-------------|
| N | -3.49247500 | -4.24059300 | -0.62813400 |
| C | -4.75537700 | -4.67507900 | -0.66832700 |
| N | -5.87577300 | -3.96974900 | -0.49625000 |
| C | -5.61932800 | -2.68772500 | -0.26020200 |
| C | -4.35742300 | -2.09871100 | -0.18967400 |
| C | -3.24473400 | -2.95164500 | -0.39040700 |
| N | -6.54341500 | -1.67716000 | -0.03639100 |
| C | -5.88305500 | -0.52442700 | 0.16194300  |
| N | -4.56563800 | -0.73999000 | 0.07671400  |
| N | -1.96550500 | -2.46605200 | -0.34283200 |
| C | -8.00116600 | -1.81929800 | -0.01605900 |
| C | -3.56726700 | 0.32761600  | 0.24859400  |

|   |             |             |             |
|---|-------------|-------------|-------------|
| H | -4.88030300 | -5.73471400 | -0.86638200 |
| H | -6.40466500 | 0.46374600  | 0.36186800  |
| H | -1.85038700 | -1.47961300 | -0.16979800 |
| H | -8.28733700 | -2.52733500 | 0.76144400  |
| H | -8.34484900 | -2.18912100 | -0.98189700 |
| H | -8.42894100 | -0.83903000 | 0.18799200  |
| H | -2.97860500 | 0.42872600  | -0.66524000 |
| H | -2.92077900 | 0.09072600  | 1.09574300  |
| H | -4.11210000 | 1.26129400  | 0.44449700  |
| N | -6.50413700 | 5.06560700  | 1.81969400  |
| C | -7.35072900 | 4.11725000  | 1.07496000  |
| C | -6.64044000 | 2.76715600  | 0.80266200  |
| O | -5.38529500 | 2.75933100  | 0.76399200  |
| O | -7.38380200 | 1.75175400  | 0.62362000  |
| H | -5.54106200 | 4.89722000  | 1.53459100  |
| H | -6.53278800 | 4.83054300  | 2.80720000  |
| H | -8.23409200 | 3.89704200  | 1.68151400  |
| C | -0.71639700 | -3.13820500 | -0.50589100 |
| O | -0.60226900 | -4.32266100 | -0.71361300 |
| O | 0.24155000  | -2.24802000 | -0.38858600 |
| H | 1.23552000  | -2.73566700 | -0.51871800 |
| N | 7.94339600  | 4.80227200  | -0.83509700 |
| C | 8.09254100  | 4.79603100  | 0.49329600  |
| N | 7.72520000  | 3.84431600  | 1.35347800  |
| C | 7.15309200  | 2.81453500  | 0.73956400  |
| C | 6.93541500  | 2.68536500  | -0.63199400 |
| C | 7.36449200  | 3.75681300  | -1.44357300 |
| N | 6.65820200  | 1.66015400  | 1.32857800  |
| C | 6.16501700  | 0.86394300  | 0.36569200  |
| N | 6.31396000  | 1.44823900  | -0.82721000 |
| N | 7.25491600  | 3.79972700  | -2.79303500 |

|   |             |             |             |
|---|-------------|-------------|-------------|
| C | 6.65793600  | 1.34705900  | 2.76102500  |
| C | 5.86995700  | 0.84258400  | -2.09157700 |
| H | 8.56864500  | 5.67346000  | 0.91795900  |
| H | 5.69699100  | -0.13608100 | 0.57048200  |
| H | 7.53300600  | 4.65356100  | -3.25165700 |
| H | 6.72507200  | 3.12241000  | -3.31254400 |
| H | 6.12333600  | 2.12774800  | 3.30112900  |
| H | 7.68433400  | 1.29642400  | 3.12360100  |
| H | 6.16115100  | 0.38758600  | 2.89397700  |
| H | 6.72968700  | 0.69882800  | -2.74831800 |
| H | 5.12889700  | 1.49068300  | -2.56357500 |
| H | 5.40783600  | -0.12347600 | -1.85508100 |
| N | 2.47719400  | -3.40320200 | -0.66585400 |
| C | 3.39685700  | -3.23343300 | 0.48534400  |
| C | 4.36100800  | -2.06352800 | 0.16363800  |
| O | 4.48459200  | -1.73145900 | -1.04119600 |
| O | 4.95466800  | -1.53764400 | 1.14587200  |
| H | 2.21628600  | -4.37657600 | -0.80724100 |
| H | 2.97002100  | -3.05883800 | -1.49280500 |
| H | 2.80489500  | -2.93382300 | 1.35484000  |
| C | 4.13828900  | -4.54938100 | 0.85011000  |
| H | 3.35490800  | -5.32018400 | 0.88422500  |
| C | -7.86064000 | 4.78571500  | -0.23438000 |
| H | -8.26466700 | 5.74883300  | 0.09943800  |
| C | 4.77059000  | -4.48624200 | 2.24641100  |
| H | 5.21188500  | -5.45314800 | 2.50603600  |
| H | 5.54848600  | -3.72197300 | 2.28966100  |
| H | 4.02381000  | -4.24172800 | 3.00753700  |
| C | 5.16626700  | -4.97128200 | -0.20932100 |
| H | 5.57488800  | -5.95715500 | 0.02968600  |
| H | 4.72845400  | -5.02800700 | -1.20969200 |

|   |             |             |             |
|---|-------------|-------------|-------------|
| H | 5.99913100  | -4.26355500 | -0.25283200 |
| C | -8.99609800 | 3.99974600  | -0.90321700 |
| H | -9.38401300 | 4.55324400  | -1.76493400 |
| H | -8.65755600 | 3.01914300  | -1.24517900 |
| H | -9.82526600 | 3.83332800  | -0.20859900 |
| C | -6.72971000 | 5.08258000  | -1.22836500 |
| H | -7.11609600 | 5.63822000  | -2.08912600 |
| H | -5.94396200 | 5.68630000  | -0.76780500 |
| H | -6.27137500 | 4.16094000  | -1.59984800 |

CO2-2[dMA][Ile]

0 1

|   |             |             |             |
|---|-------------|-------------|-------------|
| N | -3.11772000 | -4.47757000 | -0.68413200 |
| C | -4.35036000 | -4.99020400 | -0.74142200 |
| N | -5.51239200 | -4.36879900 | -0.52673100 |
| C | -5.33720500 | -3.08723800 | -0.22387800 |
| C | -4.11528400 | -2.42229000 | -0.12819700 |
| C | -2.95203400 | -3.18891900 | -0.38233300 |
| N | -6.32285200 | -2.15039800 | 0.05204500  |
| C | -5.73656500 | -0.96875500 | 0.30534400  |
| N | -4.40857500 | -1.09457400 | 0.20585800  |
| N | -1.70622800 | -2.62482400 | -0.31492700 |
| C | -7.76857000 | -2.38586400 | 0.06686900  |
| C | -3.48011500 | 0.02564200  | 0.42741900  |
| H | -4.40840400 | -6.04414300 | -0.99333500 |
| H | -6.31926200 | -0.02587900 | 0.54974600  |
| H | -1.65017400 | -1.65702700 | -0.03844800 |
| H | -8.00782300 | -3.14021800 | 0.81621000  |
| H | -8.08994700 | -2.73896700 | -0.91276900 |
| H | -8.25726300 | -1.44340400 | 0.30870400  |
| H | -2.90792500 | 0.21273100  | -0.48312500 |



|   |             |             |             |
|---|-------------|-------------|-------------|
| H | -2.81161100 | -0.21224100 | 1.25720100  |
| H | -4.08243900 | 0.90961800  | 0.67779900  |
| N | -6.71727600 | 4.49770100  | 2.19411600  |
| C | -7.49587400 | 3.53055000  | 1.40015600  |
| C | -6.70131300 | 2.23556600  | 1.09366900  |
| O | -5.44729300 | 2.30083100  | 1.09312000  |
| O | -7.37886400 | 1.18823600  | 0.85007200  |
| H | -5.73831500 | 4.37571900  | 1.94113300  |
| H | -6.77179800 | 4.24161700  | 3.17517100  |
| H | -8.37410700 | 3.23645600  | 1.98235600  |
| C | -0.42585000 | -3.17931000 | -0.61652900 |
| O | -0.24611700 | -4.30542100 | -1.01276800 |
| O | 0.47754400  | -2.25152100 | -0.39395800 |
| H | 1.48703800  | -2.62682000 | -0.64529700 |
| N | 7.61527500  | 5.51080700  | -0.67226300 |
| C | 7.89300000  | 5.38062400  | 0.62877400  |
| N | 7.65409500  | 4.32955300  | 1.41538500  |
| C | 7.07180100  | 3.33622600  | 0.75282000  |
| C | 6.72767300  | 3.33244700  | -0.59872500 |
| C | 7.02730400  | 4.50103700  | -1.33041300 |
| N | 6.68939500  | 2.10348800  | 1.26123100  |
| C | 6.14070800  | 1.38124900  | 0.27032400  |
| N | 6.14643700  | 2.08884300  | -0.86367500 |
| N | 6.78574600  | 4.67225000  | -2.65228800 |
| C | 6.84556300  | 1.64922800  | 2.64646500  |
| C | 5.61307100  | 1.58812000  | -2.13940900 |
| H | 8.36833300  | 6.23616200  | 1.09677900  |
| H | 5.74597000  | 0.33918500  | 0.41105800  |
| H | 6.97834800  | 5.58214500  | -3.04180300 |
| H | 6.23637300  | 4.02385200  | -3.18826200 |
| H | 6.31096400  | 2.32618700  | 3.31211100  |

|   |             |             |             |
|---|-------------|-------------|-------------|
| H | 7.90264300  | 1.64467900  | 2.91090500  |
| H | 6.43256000  | 0.64456100  | 2.71799100  |
| H | 6.41155100  | 1.56365000  | -2.88301900 |
| H | 4.79808800  | 2.23458200  | -2.47102600 |
| H | 5.22840100  | 0.57581000  | -1.96579900 |
| N | 2.79050800  | -3.13573000 | -0.95472900 |
| C | 3.77423500  | -2.97500700 | 0.14286600  |
| C | 4.55771300  | -1.66005600 | -0.10282900 |
| O | 4.53539700  | -1.18391500 | -1.26483500 |
| O | 5.16819400  | -1.17372300 | 0.88932000  |
| H | 2.63729000  | -4.11303100 | -1.19216300 |
| H | 3.16886600  | -2.64397900 | -1.76718800 |
| H | 3.22377200  | -2.85271700 | 1.07995800  |
| C | 4.70298500  | -4.21307300 | 0.29677300  |
| H | 4.03029000  | -5.08375400 | 0.26133000  |
| C | -8.02503500 | 4.21613500  | 0.10593000  |
| H | -8.47859300 | 5.14790800  | 0.46783700  |
| C | 5.38872600  | -4.23910500 | 1.67603600  |
| H | 6.06571400  | -3.38423200 | 1.75521900  |
| H | 4.62126800  | -4.08505900 | 2.44339500  |
| C | 5.70112500  | -4.34142000 | -0.86381000 |
| H | 6.22091700  | -5.30130100 | -0.83190700 |
| H | 5.20393100  | -4.27241500 | -1.83493500 |
| H | 6.45252100  | -3.54733800 | -0.82195600 |
| C | -9.13080800 | 3.39520100  | -0.58430500 |
| H | -8.70647600 | 2.46837100  | -0.98210100 |
| H | -9.85511700 | 3.08372000  | 0.17731500  |
| C | -6.88762600 | 4.59985300  | -0.85139600 |
| H | -7.25773300 | 5.20626100  | -1.68237500 |
| H | -6.12568100 | 5.18699800  | -0.33361600 |
| H | -6.40076700 | 3.71274300  | -1.26880700 |

|   |              |             |             |
|---|--------------|-------------|-------------|
| C | -9.87475800  | 4.15013500  | -1.69250300 |
| H | -9.22149600  | 4.39485800  | -2.53457000 |
| H | -10.70073800 | 3.54950100  | -2.08607700 |
| H | -10.29824300 | 5.08892200  | -1.31893200 |
| C | 6.13737500   | -5.54169100 | 1.98041400  |
| H | 6.99099800   | -5.69151900 | 1.31429200  |
| H | 6.52211300   | -5.53487700 | 3.00419000  |
| H | 5.48090400   | -6.41292800 | 1.88131300  |

CO2-2[dMA][Leu]

0 1

|   |             |             |             |
|---|-------------|-------------|-------------|
| N | -3.05245100 | -4.50884000 | -0.60155100 |
| C | -4.28141200 | -5.03313200 | -0.62332800 |
| N | -5.44326300 | -4.41956000 | -0.38635400 |
| C | -5.27269700 | -3.13291800 | -0.10357700 |
| C | -4.05507300 | -2.45535600 | -0.04869000 |
| C | -2.89177600 | -3.21507700 | -0.32048000 |
| N | -6.25974600 | -2.20140200 | 0.18478100  |
| C | -5.67842200 | -1.01073800 | 0.40528600  |
| N | -4.35226700 | -1.12559600 | 0.27281000  |
| N | -1.64843000 | -2.64123300 | -0.28552200 |
| C | -7.70224600 | -2.45025500 | 0.24118700  |
| C | -3.42859800 | 0.00661500  | 0.44931600  |
| H | -4.33592900 | -6.09043900 | -0.86139300 |
| H | -6.26370000 | -0.07080300 | 0.65341400  |
| H | -1.58954500 | -1.67899400 | 0.00923500  |
| H | -7.91448400 | -3.19470100 | 1.00836300  |
| H | -8.04551300 | -2.82194900 | -0.72403300 |
| H | -8.19367400 | -1.50872300 | 0.48093100  |
| H | -2.87163100 | 0.17113000  | -0.47476200 |
| H | -2.74602800 | -0.20338100 | 1.27533600  |

|   |             |             |             |
|---|-------------|-------------|-------------|
| H | -4.03379000 | 0.89351700  | 0.68313700  |
| N | -6.79121100 | 4.36319100  | 2.41729900  |
| C | -7.43506900 | 3.50692800  | 1.40620500  |
| C | -6.65021900 | 2.20362800  | 1.12907600  |
| O | -5.39864400 | 2.28254400  | 1.06318200  |
| O | -7.32825200 | 1.13941900  | 0.97069500  |
| H | -5.79915300 | 4.40567900  | 2.19067700  |
| H | -6.84310300 | 3.90788100  | 3.32463500  |
| H | -8.42168400 | 3.22845900  | 1.78330400  |
| C | -0.37979100 | -3.17854800 | -0.65376600 |
| O | -0.21204700 | -4.28359100 | -1.10913500 |
| O | 0.53104800  | -2.25845400 | -0.42096100 |
| H | 1.51974400  | -2.61644100 | -0.72921700 |
| N | 7.31784700  | 5.66773000  | -0.52887300 |
| C | 7.57019200  | 5.50517300  | 0.77372700  |
| N | 7.35080400  | 4.42149500  | 1.52076700  |
| C | 6.82002100  | 3.43025100  | 0.81327300  |
| C | 6.50786000  | 3.45816500  | -0.54574800 |
| C | 6.78162700  | 4.65982600  | -1.23244500 |
| N | 6.47051200  | 2.16898300  | 1.27301200  |
| C | 5.97162000  | 1.46025800  | 0.24657600  |
| N | 5.97840000  | 2.20399500  | -0.86402200 |
| N | 6.56403100  | 4.86492000  | -2.55375100 |
| C | 6.60921700  | 1.67622400  | 2.64688000  |
| C | 5.49366200  | 1.72607000  | -2.16771200 |
| H | 8.00383500  | 6.36114300  | 1.27987400  |
| H | 5.61319500  | 0.39989300  | 0.34384600  |
| H | 6.73091800  | 5.79360600  | -2.90934100 |
| H | 6.04746200  | 4.21632700  | -3.12124100 |
| H | 6.02537400  | 2.30517400  | 3.31830800  |
| H | 7.65764700  | 1.71126200  | 2.94157900  |

|   |             |             |             |
|---|-------------|-------------|-------------|
| H | 6.24166300  | 0.65193200  | 2.67389900  |
| H | 6.30619200  | 1.76725600  | -2.89520700 |
| H | 4.65473500  | 2.34483300  | -2.49254500 |
| H | 5.15660800  | 0.69007700  | -2.03937500 |
| N | 2.81526000  | -3.13159800 | -1.14141400 |
| C | 3.89002600  | -3.02875600 | -0.12442100 |
| C | 4.56630300  | -1.64684600 | -0.28316600 |
| O | 4.55686400  | -1.13478800 | -1.42982800 |
| O | 5.09605700  | -1.15353200 | 0.75155300  |
| H | 2.63089800  | -4.09910200 | -1.39829400 |
| H | 3.14621300  | -2.62823400 | -1.96707300 |
| H | 3.43211600  | -3.06830400 | 0.86549000  |
| C | 4.91423900  | -4.17367500 | -0.27666900 |
| H | 4.35842400  | -5.12230200 | -0.26152300 |
| C | -7.59141000 | 4.32667300  | 0.11062400  |
| H | -8.14216700 | 5.23901900  | 0.36989400  |
| C | 6.03613400  | -4.25265100 | 0.77558000  |
| H | 6.56379100  | -3.29323900 | 0.77709500  |
| C | -8.28071800 | 3.63161900  | -1.07719000 |
| H | -7.71646800 | 2.72195500  | -1.31584600 |
| C | -8.24505500 | 4.54429000  | -2.31212200 |
| H | -7.21880900 | 4.81858200  | -2.57573000 |
| H | -8.69585500 | 4.05392100  | -3.18111300 |
| H | -8.79999400 | 5.47170100  | -2.12992300 |
| C | 7.03668200  | -5.35077100 | 0.38555100  |
| H | 7.45943800  | -5.17295200 | -0.60806700 |
| H | 7.86569500  | -5.39859000 | 1.09805700  |
| H | 6.55640100  | -6.33581700 | 0.37148800  |
| H | -6.58799400 | 4.64510700  | -0.19818700 |
| C | -9.72213400 | 3.21215600  | -0.75446400 |
| H | -9.75025100 | 2.47348100  | 0.04893400  |

|   |              |             |             |
|---|--------------|-------------|-------------|
| H | -10.32125800 | 4.07827200  | -0.44920500 |
| H | -10.20471900 | 2.76881500  | -1.63188500 |
| C | 5.49504200   | -4.49020400 | 2.19242800  |
| H | 4.90354000   | -5.41208500 | 2.23860000  |
| H | 6.31744800   | -4.59072800 | 2.90734200  |
| H | 4.86770300   | -3.66255600 | 2.52920800  |
| H | 5.36207400   | -4.09076800 | -1.27459700 |

2[dMA][Gly]-CO2

O 1

|   |             |             |             |
|---|-------------|-------------|-------------|
| N | 11.50396800 | -0.54540100 | -0.08519700 |
| C | 11.60211800 | 0.78774700  | -0.09509500 |
| N | 10.61207800 | 1.68195000  | -0.07162900 |
| C | 9.41808300  | 1.09986000  | -0.03622800 |
| C | 9.16700900  | -0.27199600 | -0.02354200 |
| C | 10.29302100 | -1.12117700 | -0.05019900 |
| N | 8.18149400  | 1.72745300  | -0.00728500 |
| C | 7.22142600  | 0.78766000  | 0.02099800  |
| N | 7.77815800  | -0.42778700 | 0.01209700  |
| N | 10.24252900 | -2.47440500 | -0.05906000 |
| C | 7.93998300  | 3.17358900  | -0.00900100 |
| C | 7.00330200  | -1.67758200 | 0.03545500  |
| H | 12.61115500 | 1.18521900  | -0.12450600 |
| H | 6.11838600  | 1.02595800  | 0.04549900  |
| H | 11.11817500 | -2.97251000 | -0.02362500 |
| H | 9.38581200  | -2.98494200 | 0.06112600  |
| H | 8.36605100  | 3.61221300  | -0.91088900 |
| H | 8.41019200  | 3.62181800  | 0.86582500  |
| H | 6.86336000  | 3.33289300  | 0.01677700  |
| H | 7.24728600  | -2.24081200 | 0.93855300  |
| H | 7.23161200  | -2.26333700 | -0.85679300 |

|   |             |             |             |
|---|-------------|-------------|-------------|
| H | 5.93855900  | -1.41095300 | 0.04262600  |
| N | 1.49075200  | -0.25373600 | 0.06596400  |
| C | 2.28086200  | 0.96170800  | 0.07609600  |
| C | 3.77939800  | 0.61650800  | 0.06481800  |
| O | 4.10641400  | -0.59452600 | 0.05130500  |
| O | 4.56415900  | 1.60652600  | 0.07036400  |
| H | 2.02350600  | -1.11519800 | 0.05547100  |
| H | 2.05882300  | 1.58580900  | -0.79419200 |
| H | 2.06794700  | 1.56585800  | 0.96269600  |
| C | 0.15237600  | -0.27592700 | 0.05831600  |
| O | -0.35016600 | -1.52332000 | 0.04355600  |
| H | -1.34017400 | -1.47785600 | 0.03771400  |
| O | -0.55466900 | 0.73937000  | 0.06434600  |
| N | -3.17188500 | -1.54689300 | 0.02252900  |
| C | -3.74634700 | -2.75611900 | 0.00581700  |
| N | -5.04464400 | -3.04544600 | -0.00867000 |
| C | -5.79604800 | -1.94388300 | -0.00513900 |
| C | -5.33840100 | -0.62993100 | 0.01128300  |
| C | -3.93669900 | -0.42784400 | 0.02616500  |
| N | -7.18001700 | -1.87997200 | -0.01695200 |
| C | -7.55597800 | -0.58798600 | -0.00813700 |
| N | -6.47014200 | 0.19127400  | 0.00868300  |
| N | -3.32193700 | 0.75958700  | 0.04344300  |
| C | -8.10495300 | -3.01591900 | -0.03632100 |
| C | -6.53122600 | 1.66109400  | 0.02125000  |
| H | -3.06151900 | -3.59824400 | 0.00405200  |
| H | -8.64747500 | -0.25690800 | -0.01541300 |
| H | -2.28633500 | 0.79677500  | 0.05223800  |
| H | -3.85021700 | 1.61441700  | 0.04633700  |
| H | -7.94537900 | -3.63131900 | 0.84885200  |
| H | -7.92633000 | -3.61629400 | -0.92813600 |

|   |              |             |             |
|---|--------------|-------------|-------------|
| H | -9.11895300  | -2.61922800 | -0.04392100 |
| H | -6.02831100  | 2.05340200  | -0.86463100 |
| H | -6.05542300  | 2.03733900  | 0.92884100  |
| H | -7.59146800  | 1.94856600  | 0.00651600  |
| N | -12.23808000 | 3.06141100  | 0.00571000  |
| C | -11.94352000 | 1.63610600  | -0.13569400 |
| C | -10.46245900 | 1.21630500  | -0.05717800 |
| O | -9.58272800  | 2.10838700  | -0.04570900 |
| O | -10.24473200 | -0.03757700 | -0.03362600 |
| H | -11.58137000 | 3.57909400  | -0.57274900 |
| H | -12.02423100 | 3.35099200  | 0.95581900  |
| H | -12.49794700 | 1.07106300  | 0.61847600  |
| H | -12.31956200 | 1.28579300  | -1.10389200 |

2[dMA][Ala]-CO2

0 1

|   |             |             |             |
|---|-------------|-------------|-------------|
| N | 11.53676700 | 0.58490000  | 1.15313300  |
| C | 11.62723400 | -0.74811200 | 1.19613200  |
| N | 10.66868800 | -1.64223100 | 0.94705800  |
| C | 9.51779500  | -1.06020600 | 0.62680800  |
| C | 9.27918300  | 0.31149900  | 0.54529600  |
| C | 10.36922900 | 1.16057300  | 0.82964900  |
| N | 8.32211000  | -1.68811700 | 0.31074200  |
| C | 7.39756500  | -0.74861200 | 0.04942400  |
| N | 7.93826700  | 0.46689500  | 0.18162300  |
| N | 10.32199300 | 2.51360300  | 0.81332100  |
| C | 8.08496300  | -3.13422700 | 0.26489800  |
| C | 7.19287500  | 1.71654600  | -0.03239600 |
| H | 12.60013700 | -1.14549800 | 1.46548400  |
| H | 6.33226500  | -0.98885600 | -0.23479000 |
| H | 11.18009000 | 3.01207800  | 0.98984800  |



|   |             |             |             |
|---|-------------|-------------|-------------|
| H | 9.51361100  | 3.02468900  | 0.50655100  |
| H | 8.29755600  | -3.56778500 | 1.24164400  |
| H | 8.73922600  | -3.58684600 | -0.47976100 |
| H | 7.04144500  | -3.29364100 | -0.00126700 |
| H | 7.63582200  | 2.26735600  | -0.86464600 |
| H | 7.21651300  | 2.31418800  | 0.88066500  |
| H | 6.15584100  | 1.44923500  | -0.27256200 |
| N | 1.80313000  | 0.29314700  | -1.03027500 |
| C | 2.58368300  | -0.93706600 | -1.08942000 |
| C | 4.05318200  | -0.59603200 | -0.74876400 |
| O | 4.37114100  | 0.61401000  | -0.64292400 |
| O | 4.82874800  | -1.58471800 | -0.61569700 |
| H | 2.35080400  | 1.14062400  | -0.93398800 |
| C | 0.47600700  | 0.33035200  | -0.85242800 |
| O | 0.00233200  | 1.58226300  | -0.71757700 |
| H | -0.98128700 | 1.55017700  | -0.60422100 |
| O | -0.24931500 | -0.67205500 | -0.81772600 |
| N | -2.80412000 | 1.64774400  | -0.38475800 |
| C | -3.35374100 | 2.86225500  | -0.26144900 |
| N | -4.63719500 | 3.16613500  | -0.08743800 |
| C | -5.40127000 | 2.07433200  | -0.04143100 |
| C | -4.96941400 | 0.75652500  | -0.15510000 |
| C | -3.58200100 | 0.53880200  | -0.33816800 |
| N | -6.77561300 | 2.02627500  | 0.12798000  |
| C | -7.17014600 | 0.73985400  | 0.11878800  |
| N | -6.10597000 | -0.05097300 | -0.04999600 |
| N | -2.99238500 | -0.65459000 | -0.46587100 |
| C | -7.67449200 | 3.17131100  | 0.29242700  |
| C | -6.19114000 | -1.51851400 | -0.10685200 |
| H | -2.66021000 | 3.69576600  | -0.31054700 |
| H | -8.25737000 | 0.42191300  | 0.23943400  |

|   |              |             |             |
|---|--------------|-------------|-------------|
| H | -1.96559100  | -0.70383300 | -0.59830300 |
| H | -3.53143800  | -1.50224400 | -0.43838400 |
| H | -7.60718800  | 3.81675700  | -0.58315300 |
| H | -7.38646000  | 3.73696400  | 1.17835100  |
| H | -8.68715800  | 2.78637100  | 0.40184500  |
| H | -5.60412200  | -1.94883500 | 0.70673600  |
| H | -5.81954200  | -1.86710400 | -1.07229500 |
| H | -7.24881700  | -1.79286300 | 0.00779900  |
| N | -11.89384500 | -2.77691200 | 0.08784100  |
| C | -11.55561100 | -1.45772900 | 0.63707900  |
| C | -10.08703200 | -1.02663300 | 0.40429500  |
| O | -9.22442400  | -1.92181000 | 0.23657300  |
| O | -9.85382700  | 0.22402900  | 0.43084400  |
| H | -11.13747700 | -3.41291600 | 0.33408400  |
| H | -11.87410400 | -2.73002300 | -0.92724800 |
| H | -12.19142600 | -0.71211500 | 0.15094300  |
| C | -11.84958400 | -1.43585400 | 2.14371800  |
| H | -11.62746300 | -0.45392900 | 2.56767400  |
| H | -12.89970300 | -1.67813400 | 2.32288800  |
| H | -11.23625200 | -2.18147700 | 2.66055800  |
| H | 2.21930100   | -1.62634400 | -0.32244500 |
| C | 2.48341700   | -1.62728600 | -2.45732100 |
| H | 1.44460700   | -1.88596300 | -2.67031800 |
| H | 2.84907800   | -0.96574300 | -3.24796400 |
| H | 3.08509900   | -2.53752500 | -2.45517100 |

2[dMA][Val]-CO2

0 1

|   |              |             |             |
|---|--------------|-------------|-------------|
| N | -11.84604000 | 1.00972000  | -1.53192400 |
| C | -11.95483200 | -0.29953300 | -1.77908200 |
| N | -11.02005400 | -1.24060600 | -1.63439000 |

|   |              |             |             |
|---|--------------|-------------|-------------|
| C | -9.87454800  | -0.73776400 | -1.18631000 |
| C | -9.62003000  | 0.60013600  | -0.88593300 |
| C | -10.68473400 | 1.50520200  | -1.07915900 |
| N | -8.70233500  | -1.43105600 | -0.92307900 |
| C | -7.77697600  | -0.56175400 | -0.48281200 |
| N | -8.29441800  | 0.67037000  | -0.44765500 |
| N | -10.62618700 | 2.83460800  | -0.82946900 |
| C | -8.48784600  | -2.87157200 | -1.09152400 |
| C | -7.54265500  | 1.85694300  | -0.01208500 |
| H | -12.92190600 | -0.63124200 | -2.14205500 |
| H | -6.73123100  | -0.86466200 | -0.19076600 |
| H | -11.44038400 | 3.38658900  | -1.04939500 |
| H | -9.77658300  | 3.30007200  | -0.56423400 |
| H | -8.64964400  | -3.14335000 | -2.13426700 |
| H | -9.18997400  | -3.41934400 | -0.46363500 |
| H | -7.46357700  | -3.09382200 | -0.79739600 |
| H | -8.03961000  | 2.30620600  | 0.84968600  |
| H | -7.48025300  | 2.57061000  | -0.83605000 |
| H | -6.53448400  | 1.52720800  | 0.26935300  |
| N | -2.27973600  | 0.20231400  | 1.11031700  |
| C | -3.05064400  | -1.02616200 | 0.94764100  |
| C | -4.49707500  | -0.62298700 | 0.56764100  |
| O | -4.81842100  | 0.58601900  | 0.68045100  |
| O | -5.25469500  | -1.55561600 | 0.17577200  |
| H | -2.83327100  | 1.05121200  | 1.13285600  |
| C | -0.95294700  | 0.28227500  | 0.93962400  |
| O | -0.49561500  | 1.54577200  | 1.00707300  |
| H | 0.48799900   | 1.54593900  | 0.88796600  |
| O | -0.21444500  | -0.69198000 | 0.74588700  |
| N | 2.30419400   | 1.70614400  | 0.68802300  |
| C | 2.83005500   | 2.93651800  | 0.73154600  |

|   |             |             |             |
|---|-------------|-------------|-------------|
| N | 4.10892800  | 3.28466000  | 0.61773100  |
| C | 4.89589300  | 2.22250200  | 0.44381000  |
| C | 4.49017700  | 0.89298300  | 0.38072500  |
| C | 3.10481200  | 0.62720400  | 0.50973000  |
| N | 6.27307900  | 2.22304100  | 0.29180800  |
| C | 6.69396300  | 0.95379300  | 0.14331600  |
| N | 5.64481000  | 0.12739800  | 0.19231600  |
| N | 2.53735800  | -0.58295400 | 0.47063400  |
| C | 7.14993700  | 3.39678400  | 0.29308800  |
| C | 5.76039900  | -1.33361600 | 0.06512200  |
| H | 2.11885500  | 3.74335000  | 0.87771500  |
| H | 7.78671900  | 0.67534400  | 0.00285600  |
| H | 1.50882000  | -0.66656700 | 0.56812600  |
| H | 3.09230200  | -1.40948900 | 0.33346500  |
| H | 7.04727300  | 3.92677900  | 1.23976300  |
| H | 6.87022200  | 4.06242800  | -0.52326100 |
| H | 8.17322200  | 3.04791200  | 0.16358000  |
| H | 5.21729000  | -1.66638700 | -0.82146800 |
| H | 5.35767600  | -1.80860200 | 0.96157400  |
| H | 6.82790900  | -1.57250400 | -0.03357300 |
| N | 11.43954300 | -2.44677900 | 0.23467600  |
| C | 11.16372600 | -1.10224100 | -0.29929600 |
| C | 9.67090400  | -0.70455200 | -0.18111700 |
| O | 8.81831600  | -1.62451800 | -0.12476900 |
| O | 9.40548500  | 0.53903400  | -0.16032500 |
| H | 10.61584700 | -3.01775200 | 0.05436600  |
| H | 11.50837700 | -2.39447200 | 1.24648100  |
| H | 11.73513200 | -0.37661200 | 0.28706400  |
| C | 11.68135200 | -1.00321300 | -1.76356700 |
| H | 12.70699100 | -1.38668500 | -1.70870300 |
| H | -2.63311400 | -1.59487900 | 0.11244500  |

|   |             |             |             |
|---|-------------|-------------|-------------|
| C | -2.97215300 | -1.92238800 | 2.21870600  |
| H | -1.90620100 | -1.94865800 | 2.46971500  |
| C | -3.41552500 | -3.36434200 | 1.94291600  |
| H | -3.25827700 | -3.98326800 | 2.83196400  |
| H | -4.47068200 | -3.40741500 | 1.66738700  |
| H | -2.83876900 | -3.80349000 | 1.12312900  |
| C | -3.72574800 | -1.31659700 | 3.40960600  |
| H | -4.80603800 | -1.30946500 | 3.23275800  |
| H | -3.54040500 | -1.90081100 | 4.31592100  |
| H | -3.40849700 | -0.28857500 | 3.60271400  |
| C | 11.73914400 | 0.44068800  | -2.27954500 |
| H | 12.19082300 | 0.46968300  | -3.27685300 |
| H | 10.74307900 | 0.88528600  | -2.33663400 |
| H | 12.34034600 | 1.07363700  | -1.61936500 |
| C | 10.90365300 | -1.90770900 | -2.72934600 |
| H | 11.35819600 | -1.88178000 | -3.72506300 |
| H | 10.90533000 | -2.94634500 | -2.38995100 |
| H | 9.86167500  | -1.58737100 | -2.82599800 |

2[dMA][Ile]-CO2

0 1

|   |              |             |            |
|---|--------------|-------------|------------|
| N | -11.98919100 | -1.64494200 | 1.54564400 |
| C | -12.07619000 | -0.45867200 | 2.15568200 |
| N | -11.15299400 | 0.50308800  | 2.21115800 |
| C | -10.04475500 | 0.16567100  | 1.56022000 |
| C | -9.81521900  | -1.03193800 | 0.88336100 |
| C | -10.86480700 | -1.97444000 | 0.89267100 |
| N | -8.89278800  | 0.92536900  | 1.41957600 |
| C | -8.00250800  | 0.22811700  | 0.69358500 |
| N | -8.52363000  | -0.95515800 | 0.35396100 |
| N | -10.81792900 | -3.19224900 | 0.30280200 |

|   |              |             |             |
|---|--------------|-------------|-------------|
| C | -8.66321800  | 2.26585400  | 1.96710800  |
| C | -7.80465500  | -1.96254500 | -0.44047200 |
| H | -13.01313500 | -0.25866600 | 2.66473700  |
| H | -6.97688800  | 0.61672400  | 0.43034500  |
| H | -11.64984000 | -3.76015800 | 0.33989000  |
| H | -10.04871400 | -3.48834200 | -0.27117700 |
| H | -8.76619200  | 2.23713400  | 3.05144800  |
| H | -9.39626500  | 2.95823400  | 1.55398600  |
| H | -7.65568300  | 2.57201300  | 1.69089500  |
| H | -8.33898700  | -2.13861400 | -1.37629500 |
| H | -7.72161600  | -2.88630900 | 0.13492700  |
| H | -6.80314200  | -1.56697500 | -0.65204700 |
| N | -2.53655900  | -0.06548000 | -1.13643700 |
| C | -3.31353500  | 1.07746100  | -0.66770400 |
| C | -4.75858600  | 0.58602500  | -0.40467300 |
| O | -5.07220800  | -0.56185400 | -0.80603700 |
| O | -5.52176400  | 1.39266500  | 0.19926400  |
| H | -3.08305300  | -0.88815600 | -1.36453000 |
| C | -1.20666800  | -0.16624900 | -1.00588100 |
| O | -0.73343400  | -1.36482700 | -1.39256900 |
| H | 0.25212400   | -1.37506100 | -1.29392900 |
| O | -0.47824700  | 0.74034300  | -0.58208200 |
| N | 2.08362200   | -1.53444500 | -1.18295900 |
| C | 2.63424700   | -2.69444100 | -1.56177800 |
| N | 3.92380200   | -3.02078100 | -1.58178300 |
| C | 4.69363100   | -2.01708100 | -1.16006500 |
| C | 4.26157300   | -0.76346300 | -0.73835700 |
| C | 2.86724200   | -0.51546900 | -0.75327500 |
| N | 6.07535500   | -2.01432600 | -1.05589400 |
| C | 6.47354200   | -0.81544200 | -0.59287000 |
| N | 5.40527000   | -0.03816600 | -0.39104500 |

|   |             |             |             |
|---|-------------|-------------|-------------|
| N | 2.27623100  | 0.62512800  | -0.38220600 |
| C | 6.97696800  | -3.11999600 | -1.38916200 |
| C | 5.49237800  | 1.34051700  | 0.11494100  |
| H | 1.93586400  | -3.45689700 | -1.89201000 |
| H | 7.56422400  | -0.55095500 | -0.41350000 |
| H | 1.24433100  | 0.70537600  | -0.43783800 |
| H | 2.81901400  | 1.40830300  | -0.06298500 |
| H | 6.85852600  | -3.38276900 | -2.44016600 |
| H | 6.73548300  | -3.98589700 | -0.77303300 |
| H | 7.99583300  | -2.78914800 | -1.19417700 |
| H | 4.95502800  | 1.41469800  | 1.06221400  |
| H | 5.06643600  | 2.02515900  | -0.62091900 |
| H | 6.55566700  | 1.56982200  | 0.26689300  |
| N | 11.14151200 | 2.58056100  | 0.36395500  |
| C | 10.90276600 | 1.12782600  | 0.41971500  |
| C | 9.41902200  | 0.75700700  | 0.16860300  |
| O | 8.54594400  | 1.63019600  | 0.39494300  |
| O | 9.18208900  | -0.42267500 | -0.24260400 |
| H | 10.29108200 | 3.03902500  | 0.68586000  |
| H | 11.24469900 | 2.86369800  | -0.60564700 |
| H | 11.48878800 | 0.65299900  | -0.37271100 |
| C | 11.43045500 | 0.55929000  | 1.77012400  |
| H | 12.43932700 | 0.98251100  | 1.85745400  |
| H | -2.90033700 | 1.41414100  | 0.28714900  |
| C | -3.23596500 | 2.27143000  | -1.66545100 |
| H | -2.17150000 | 2.34962300  | -1.91668400 |
| C | -4.01120400 | 1.98757700  | -2.95926900 |
| H | -5.09115000 | 1.97981500  | -2.77919800 |
| H | -3.80339300 | 2.74510900  | -3.71859900 |
| H | -3.73214400 | 1.01733200  | -3.37813100 |
| C | -3.64065800 | 3.59981700  | -1.00012300 |

|   |             |             |             |
|---|-------------|-------------|-------------|
| H | -3.10470300 | 3.68261400  | -0.04728600 |
| H | -4.70355900 | 3.56873700  | -0.74593400 |
| C | -3.33182800 | 4.83992500  | -1.84701900 |
| H | -3.91700500 | 4.86478500  | -2.77044200 |
| H | -3.56166300 | 5.75490600  | -1.29289400 |
| H | -2.27285800 | 4.87950200  | -2.12407000 |
| C | 10.61341300 | 1.06536100  | 2.96749500  |
| H | 9.59791400  | 0.65650200  | 2.95779600  |
| H | 11.08240300 | 0.78418700  | 3.91411900  |
| H | 10.53577400 | 2.15491500  | 2.95336500  |
| C | 11.56638800 | -0.97483400 | 1.75088700  |
| H | 12.07581000 | -1.26501300 | 0.82445200  |
| H | 10.57348900 | -1.43123000 | 1.69504600  |
| C | 12.34298300 | -1.55176400 | 2.94091800  |
| H | 11.82905400 | -1.37969200 | 3.89068900  |
| H | 12.47382000 | -2.63315900 | 2.83360900  |
| H | 13.34029600 | -1.10507000 | 3.01934300  |

2[dMA][Leu]-CO2

0 1

|   |              |             |            |
|---|--------------|-------------|------------|
| N | -11.94078700 | -1.74182600 | 1.52669600 |
| C | -12.01074900 | -0.57957200 | 2.18337800 |
| N | -11.07595400 | 0.36842400  | 2.27173200 |
| C | -9.97614200  | 0.04530300  | 1.59962800 |
| C | -9.76546100  | -1.12565400 | 0.87194600 |
| C | -10.82535600 | -2.05640200 | 0.85139800 |
| N | -8.81730500  | 0.79812100  | 1.47987700 |
| C | -7.94162500  | 0.12288000  | 0.71632400 |
| N | -8.47861100  | -1.03959900 | 0.33248900 |
| N | -10.80655000 | -3.23772100 | 0.19009900 |
| C | -8.56902200  | 2.11276100  | 2.07945600 |



|   |              |             |             |
|---|--------------|-------------|-------------|
| C | -7.77996000  | -2.01832400 | -0.51422000 |
| H | -12.94187000 | -0.38995200 | 2.70688600  |
| H | -6.91566600  | 0.51249900  | 0.45737200  |
| H | -11.60901200 | -3.83961700 | 0.28897300  |
| H | -9.98658800  | -3.58796400 | -0.27232300 |
| H | -8.65726500  | 2.03982600  | 3.16303900  |
| H | -9.30200900  | 2.82726000  | 1.70581000  |
| H | -7.56295200  | 2.42247800  | 1.80196000  |
| H | -8.34619100  | -2.17286200 | -1.43451700 |
| H | -7.66870000  | -2.95745100 | 0.03148200  |
| H | -6.78937700  | -1.60851000 | -0.74929800 |
| N | -2.52377200  | -0.09285300 | -1.26492000 |
| C | -3.31165100  | 1.04224400  | -0.79458800 |
| C | -4.73462300  | 0.52890200  | -0.47558200 |
| O | -5.07655800  | -0.58385000 | -0.94662200 |
| O | -5.45794100  | 1.28941300  | 0.23009100  |
| H | -3.06253700  | -0.90760900 | -1.53390700 |
| C | -1.19061300  | -0.17234000 | -1.16758300 |
| O | -0.70654400  | -1.35633500 | -1.58508800 |
| H | 0.28030400   | -1.35524700 | -1.49952700 |
| O | -0.46859300  | 0.73919400  | -0.74306600 |
| N | 2.11136900   | -1.50195800 | -1.39220900 |
| C | 2.67100500   | -2.64967700 | -1.79432000 |
| N | 3.96118100   | -2.97415400 | -1.79844200 |
| C | 4.72087800   | -1.98300100 | -1.33114600 |
| C | 4.27879400   | -0.74275000 | -0.88125400 |
| C | 2.88470900   | -0.49518500 | -0.91741600 |
| N | 6.10006500   | -1.98289000 | -1.19775200 |
| C | 6.48706300   | -0.79855100 | -0.69001200 |
| N | 5.41410300   | -0.02796200 | -0.48763900 |
| N | 2.28476200   | 0.63411900  | -0.52692900 |

|   |             |             |             |
|---|-------------|-------------|-------------|
| C | 7.00968500  | -3.07750300 | -1.54543800 |
| C | 5.48878900  | 1.33460800  | 0.06226300  |
| H | 1.98033700  | -3.40275400 | -2.16037400 |
| H | 7.57342500  | -0.53893300 | -0.48244200 |
| H | 1.25308600  | 0.71180300  | -0.59255300 |
| H | 2.81915000  | 1.40527600  | -0.16681700 |
| H | 6.91357800  | -3.30833400 | -2.60618200 |
| H | 6.75632600  | -3.96185800 | -0.96110500 |
| H | 8.02382700  | -2.75214500 | -1.31915900 |
| H | 4.93377400  | 1.37833200  | 1.00124800  |
| H | 5.07472600  | 2.04073900  | -0.65991700 |
| H | 6.54881100  | 1.56083700  | 0.24094800  |
| N | 11.22315800 | 2.49977700  | 0.11645300  |
| C | 10.87918000 | 1.11958200  | 0.49805300  |
| C | 9.41134000  | 0.75119700  | 0.18181900  |
| O | 8.53099300  | 1.61559800  | 0.41432200  |
| O | 9.19128400  | -0.41371200 | -0.28036600 |
| H | 10.47498800 | 3.10380200  | 0.45211600  |
| H | 11.20505900 | 2.58262000  | -0.89649100 |
| H | 11.52189500 | 0.44509000  | -0.07223800 |
| C | 11.16323000 | 0.95219900  | 2.00353300  |
| H | 12.20864800 | 1.23930100  | 2.16897900  |
| H | -2.86739800 | 1.41497700  | 0.12958800  |
| C | -3.32791100 | 2.17195200  | -1.85389300 |
| H | -2.28925900 | 2.33114400  | -2.16492600 |
| C | -3.92674300 | 3.52344000  | -1.42247400 |
| C | 10.91026000 | -0.43866400 | 2.61276600  |
| H | -3.86587900 | 1.79803800  | -2.73319100 |
| C | -4.02913400 | 4.45559300  | -2.63909600 |
| H | -4.47797800 | 5.41525900  | -2.36414000 |
| H | -3.03934200 | 4.66272400  | -3.06206700 |

|   |             |             |             |
|---|-------------|-------------|-------------|
| H | -4.64215300 | 4.01386800  | -3.43099000 |
| C | 11.12151300 | -0.39039800 | 4.13334400  |
| H | 10.47127800 | 0.35459800  | 4.60243500  |
| H | 10.90942700 | -1.36011300 | 4.59536200  |
| H | 12.15712400 | -0.12650500 | 4.37670500  |
| H | 10.54908000 | 1.68890200  | 2.53598700  |
| H | -4.93587200 | 3.33977100  | -1.04174200 |
| H | 9.86332500  | -0.70749900 | 2.42736200  |
| C | 11.78785300 | -1.52610100 | 1.97642100  |
| H | 12.85109700 | -1.27786700 | 2.07704100  |
| H | 11.62602700 | -2.49300500 | 2.46453700  |
| H | 11.56203300 | -1.64849200 | 0.91533600  |
| C | -3.11507700 | 4.18933200  | -0.30201400 |
| H | -2.07503700 | 4.34520500  | -0.60991100 |
| H | -3.53725100 | 5.16660300  | -0.04715500 |
| H | -3.10911800 | 3.58773200  | 0.60967900  |
